# Supplementary material
Source: MDPI journal article supplement (https://www.mdpi.com/2073-4433/12/11/1383)
Supplement: s1 [file s1]

# Supplementary Materials for: Applications and Limitations of Quantifying Speciated and Source-Appportioned VOCs with Metal Oxide Sensors

Kristen Okorn <sup>1,\*</sup> and Michael Hannigan<sup>2</sup>

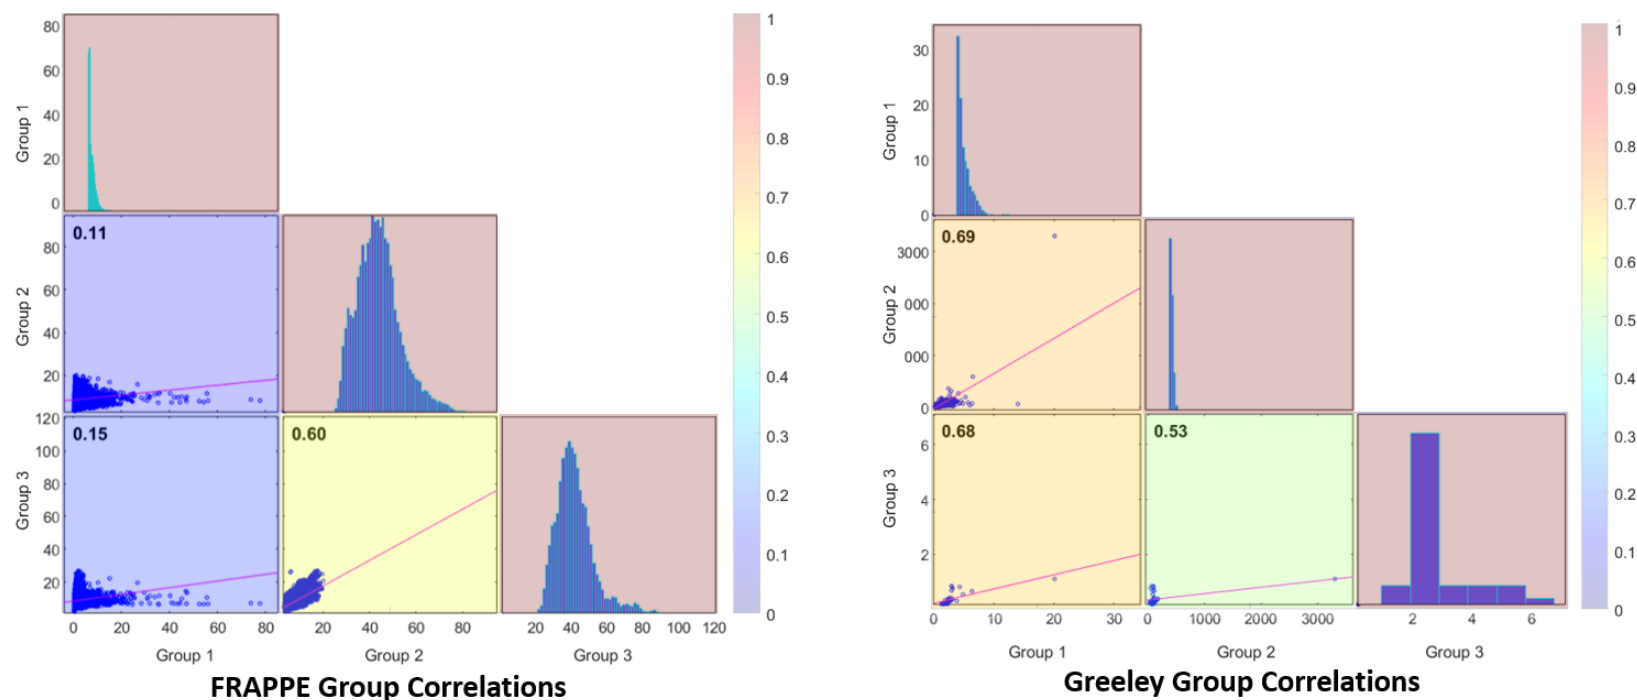

Figure S1. Colored correlation matrices for FRAPPE & Greeley PMF groups.
